# Supplementary material for: The VELVET A Orthologue VEL1 of Trichoderma reesei Regulates Fungal Development and Is Essential for Cellulase Gene Expression
Source: PLoS One. 2014 Nov 11;9(11):e112799. doi: 10.1371/journal.pone.0112799 (PMC4227869; doi:10.1371/journal.pone.0112799)
Supplement: Table S1 — Oligonucleotide primers used in this work. (XLSX) [file pone.0112799.s002.xlsx]

## Sheet: Supp Table S1
Supplementary Table S1: Primers used in this study
Forward primer		reverse primer
Name	sequence (primer forward 5´→3´)	Name	sequence (primer reverse 5´→3´)	Purpose
Pfw_Dvel1_ApaI	TGGGCCCACCAGCAGCAGAAAGCAC	Prev_Dvel1_XhoI	TCTCGAGGATGCCGCGTTTGTTTCA	construction of ∆vel1
Tfw_Dvel1_ XhoI	TCTCGAGGGCCATTGGACGAGTGTT	Dvel1_Trev1_ClaI	TATCGATTACCTATCGAGACTCATGG	construction of ∆vel1
Fw_Ptef1:vel1_ClaI	GCTATCGATGGCGACGCCTTCCTCCGT	Tef1:vel1-HindIII	TAGTACCCCAAAGCTTTCAGGA	construction of tef1:vel1 of T.reesei
Vel1-ATG	ACAAACGCGGCATCATGG	Vel1-stop	CAATGGCCTTACACCTGG	vel1 probe for Southern blot
pVel1	GCAAAAACGCACTGTAACTGG	hph_int	GTGTATTGACCGATTCCTTG	PCR Diagnosis of ∆vel1
Vel_int1	CGACTACAATGCCAACTTC	Vel_int2	GTCGACGCATATACGGAAG	PCR diagnosis of vel1 wild-type copy
